# Supplementary material for: A CRISPR Cas9 high-throughput genome editing toolkit for kinetoplastids
Source: PubMed Central journal article supplement (PMC5451818; doi:10.1098/rsos.170095), 2017-05-03
Supplement: rsos170095supp1.pdf [file rsos170095supp1.pdf]

## Supplementary Tables

**Table S1. List of pPLOT plasmids**

| Name                                 | Resistance | 5' tagging cassette                     |           | 3' tagging cassette                     |           |
|--------------------------------------|------------|-----------------------------------------|-----------|-----------------------------------------|-----------|
|                                      |            | tags                                    | size (kb) | tags                                    | size (kb) |
| pPLOT- <b>mNG</b><br>blast-blast     | BLAST      | Myc <sub>(3)</sub> ::mNeonGreen         | 2.1       | mNeonGreen::Myc <sub>(3)</sub>          | 2.5       |
| pPLOT- <b>mNG</b><br>neo-neo         | NEO        | Myc <sub>(3)</sub> ::mNeonGreen         | 2.5       | mNeonGreen::Myc <sub>(3)</sub>          | 2.9       |
| pPLOT- <b>mNG</b><br>puro-puro       | PURO       | Myc <sub>(3)</sub> ::mNeonGreen         | 2.3       | mNeonGreen::Myc <sub>(3)</sub>          | 2.7       |
| pPLOT- <b>mCherry</b><br>phleo-phleo | BLE        | Myc <sub>(3)</sub> ::mCherry            | 2.1       | mCherry::Myc <sub>(3)</sub>             | 2.5       |
| pPLOT- <b>mCherry</b><br>puro-puro   | PURO       | Myc <sub>(3)</sub> ::mCherry            | 2.3       | mCherry::Myc <sub>(3)</sub>             | 2.7       |
| pPLOT- <b>Halo</b><br>phleo-phleo    | BLE        | Myc <sub>(3)</sub> ::Ty::Halo::Ty       | 2.3       | Ty::Halo::Ty::Myc <sub>(3)</sub>        | 2.7       |
| pPLOT- <b>Halo</b><br>puro-puro      | PURO       | Myc <sub>(3)</sub> ::Ty::Halo::Ty       | 2.4       | Ty::Halo::Ty::Myc <sub>(3)</sub>        | 2.8       |
| pPLOT-10 <b>Ty</b><br>puro-puro      | PURO       | Myc <sub>(3)</sub> ::Ty <sub>(10)</sub> | 2.0       | Ty <sub>(10)</sub> ::Myc <sub>(3)</sub> | 2.3       |
| pPLOT- <b>nanoLuc</b><br>puro-puro   | PURO       | Myc <sub>(3)</sub> ::Luciferase         | 2.1       | Luciferase::Myc <sub>(3)</sub>          | 2.5       |
| pPLOT- <b>nanoLuc</b><br>phleo-phleo | BLE        | Myc <sub>(3)</sub> ::Luciferase         | 1.9       | Luciferase::Myc <sub>(3)</sub>          | 2.3       |
| pPLOT- <b>BirA*</b><br>puro-puro     | PURO       | Myc <sub>(3)</sub> ::BirA*              | 2.6       | BirA*::Myc <sub>(3)</sub>               | 3.0       |
| pPLOT- <b>BirA*</b><br>phleo-phleo   | BLE        | Myc <sub>(3)</sub> ::BirA*              | 2.4       | BirA*::Myc <sub>(3)</sub>               | 2.8       |

**Table S2. List of pT plasmids**

| Name    | Resistance | knockout cassette size (kb) |
|---------|------------|-----------------------------|
| pTBlast | BLAST      | 1.7                         |
| pTNeo   | NEO        | 1.75                        |
| pTPuro  | PURO       | 1.8                         |

**Table S3. List of expression plasmids for Cas9, T7 RNAP, and adback**

| Name          | Resistance    | protein expression    | targeting sequences | species                |
|---------------|---------------|-----------------------|---------------------|------------------------|
| <b>pRM006</b> | HYG           | hSpCas9               | β-tubulin array     | <i>L. major</i>        |
| <b>pTB007</b> | HYG           | hSpCas9,<br>T7 RNAP   | β-tubulin array     | <i>L. major</i>        |
| <b>pTB008</b> | PHLEO         | T7 RNAP               | SSU rRNA            | <i>Leishmania</i> spp. |
| <b>pTB011</b> | PURO<br>BLAST | hSpCas9               | β-tubulin array     | <i>T. brucei</i>       |
| <b>pTadd</b>  | PHLEO         | (experiment-specific) | β-tubulin array     | <i>L. major</i>        |

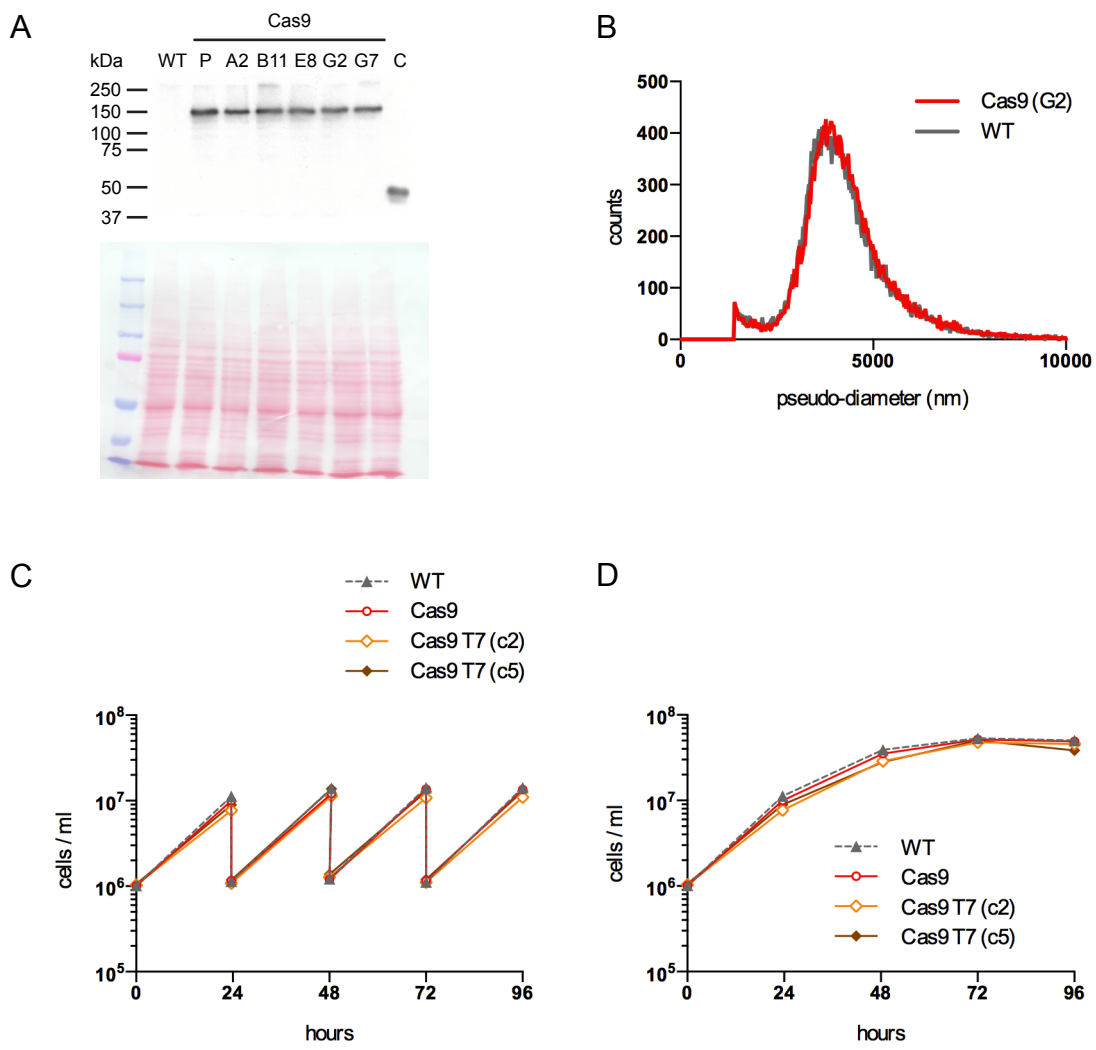

Fig. S1

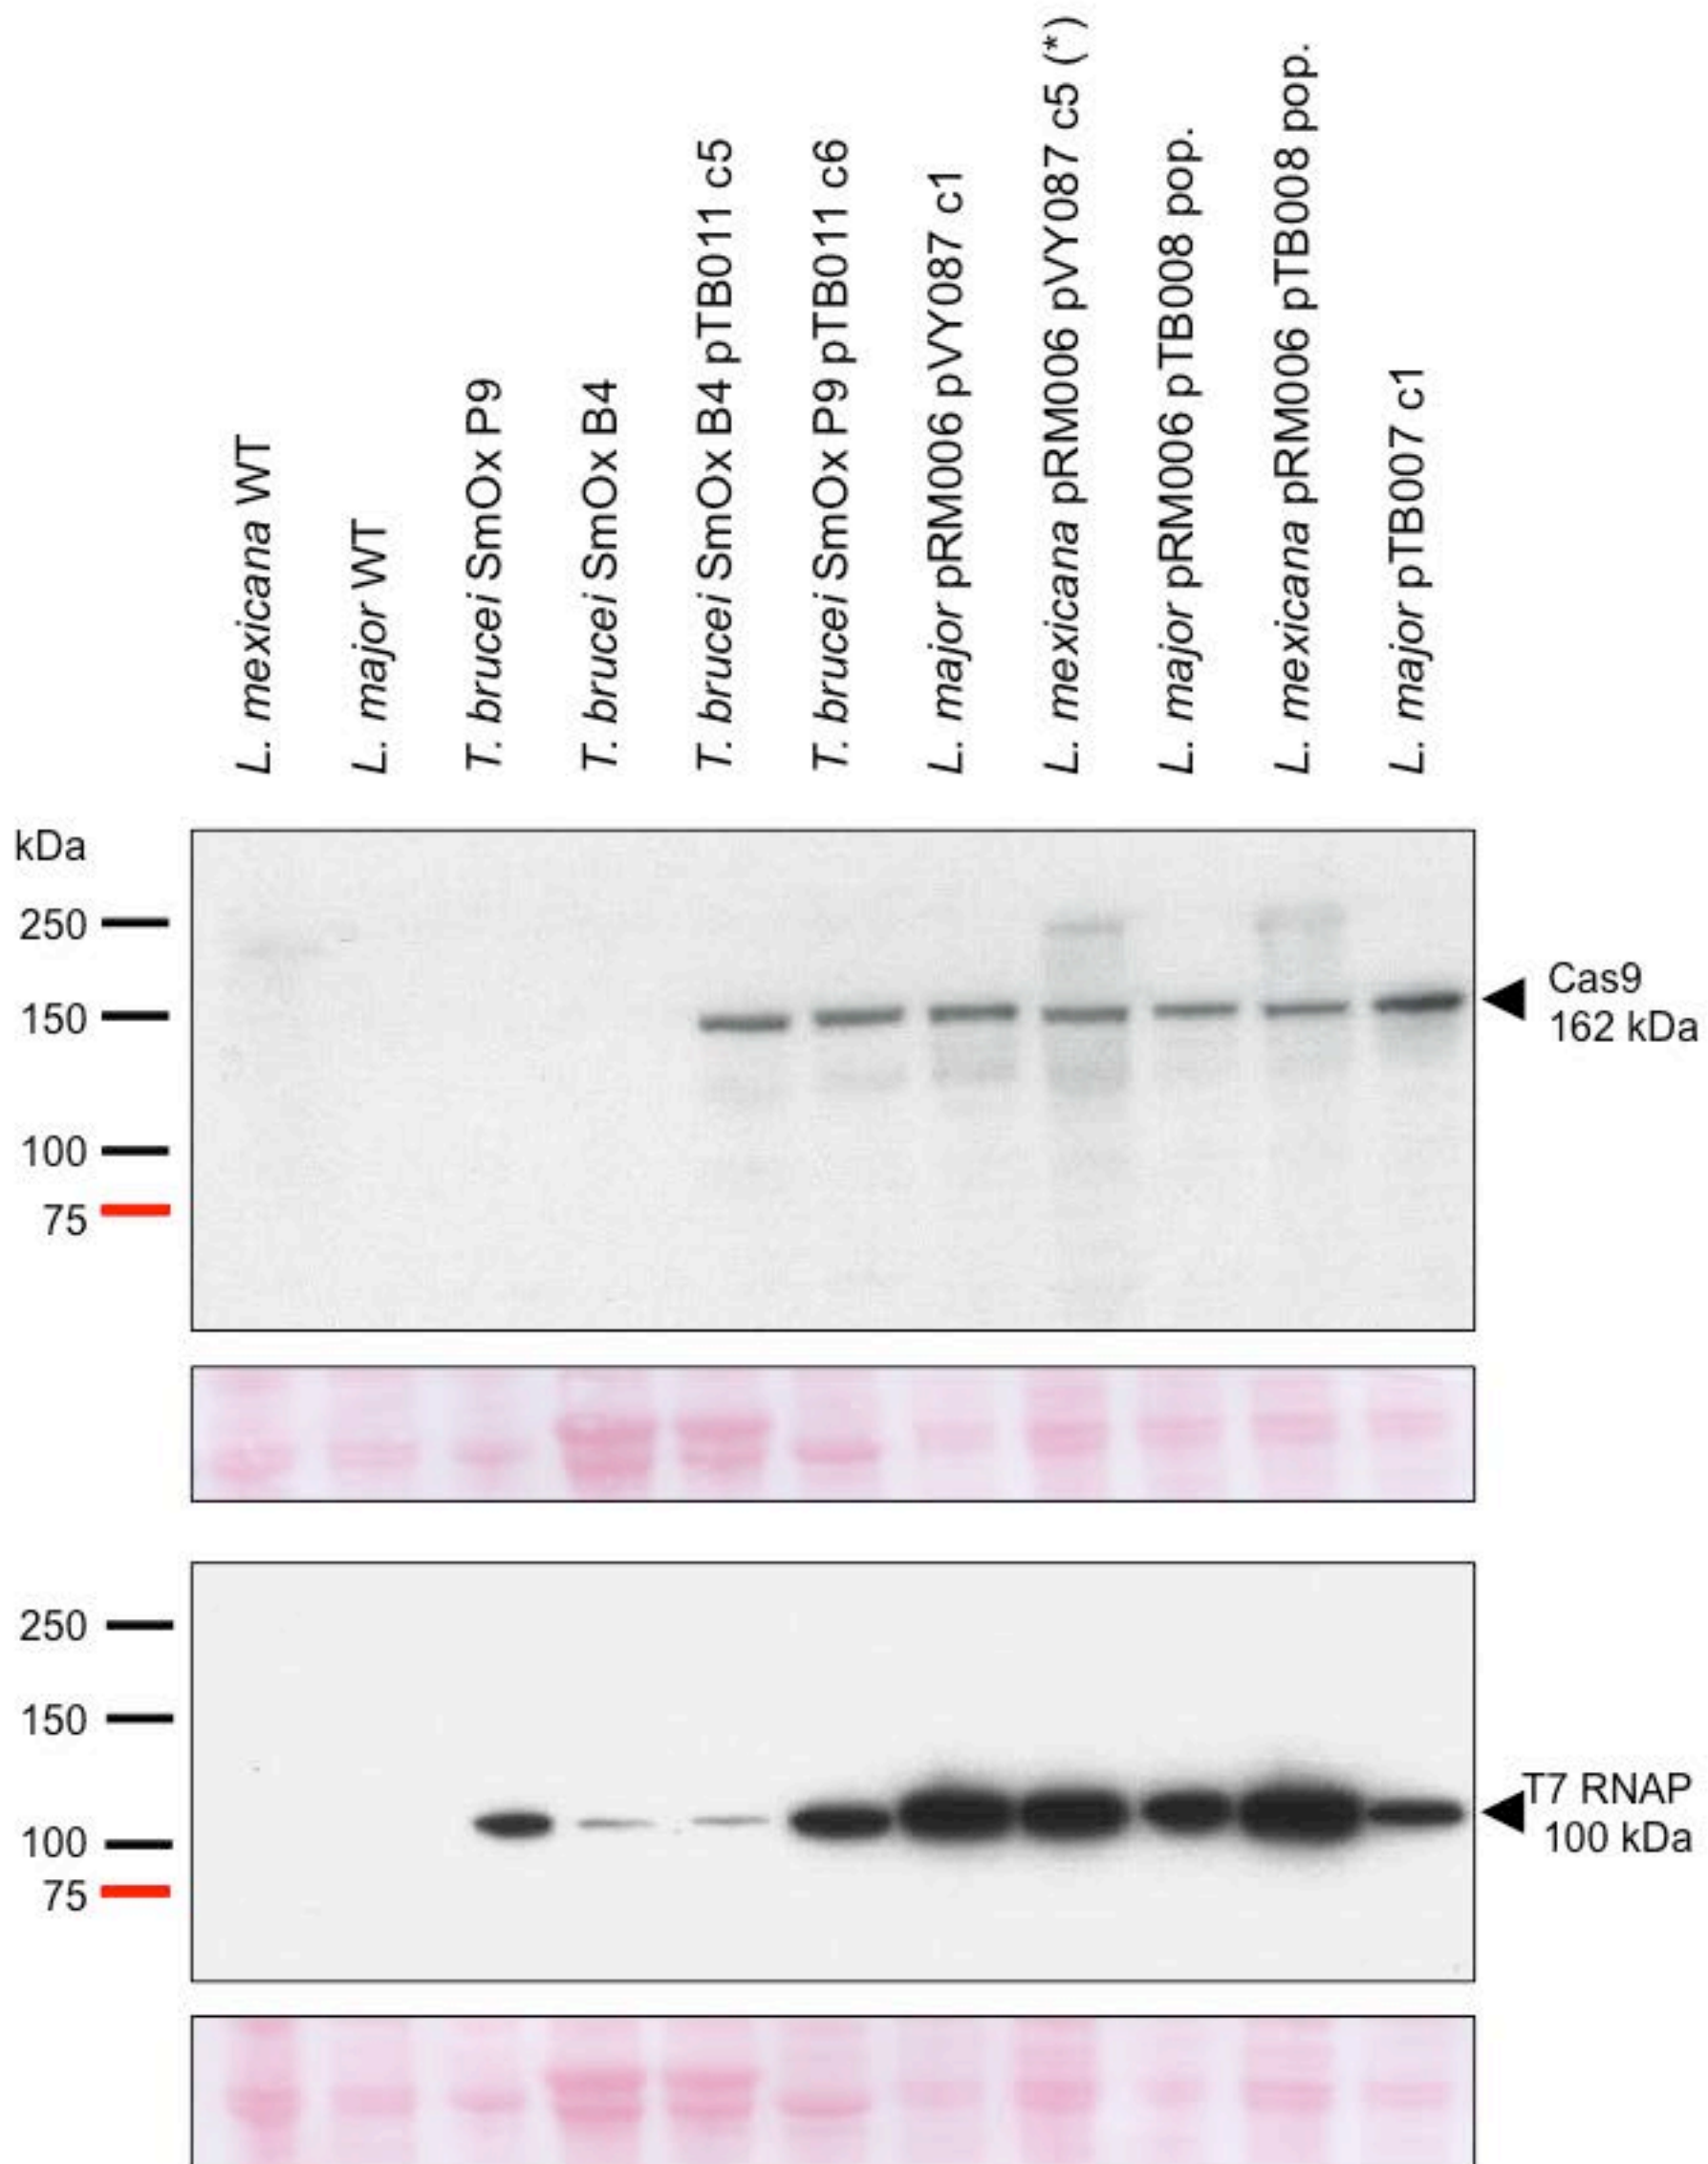

Fig. S2

# pPLOT Blast-mNeonGreen-Blast

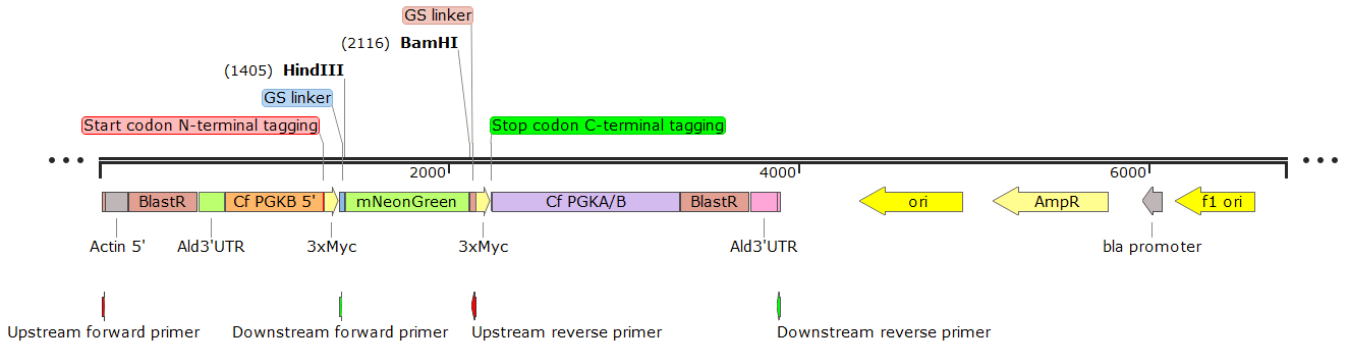

# pTBlast

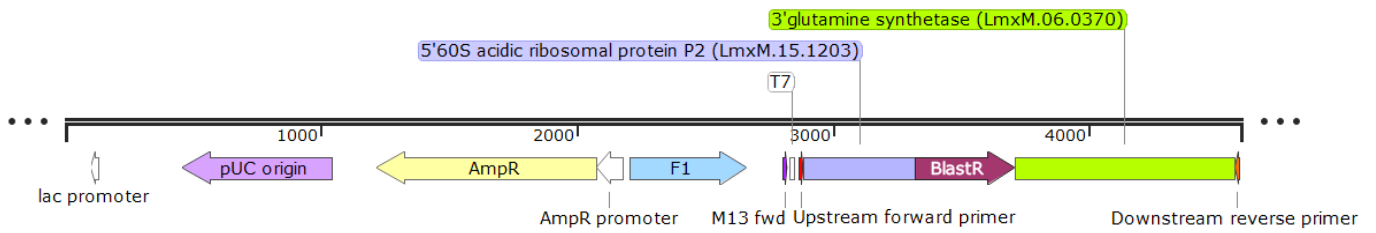

# pTPuro

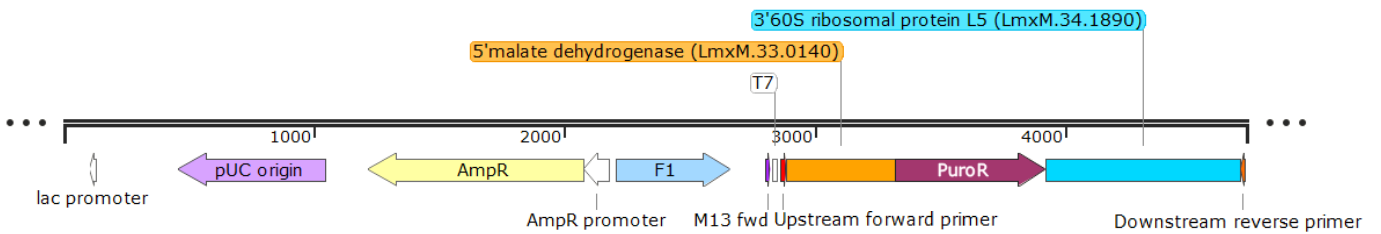

# pTNeo

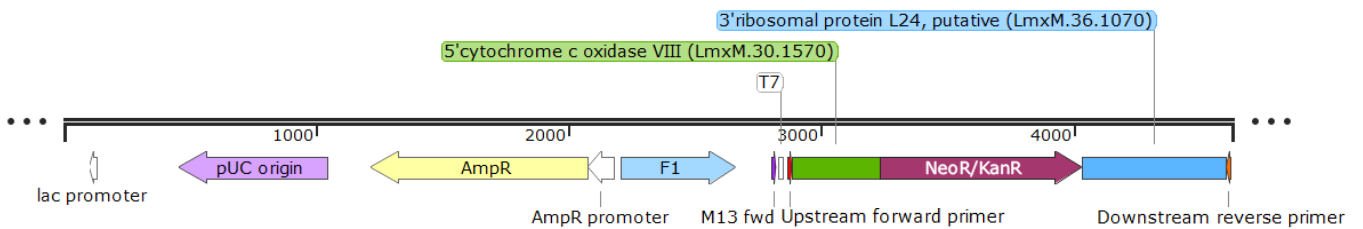

Fig. S3

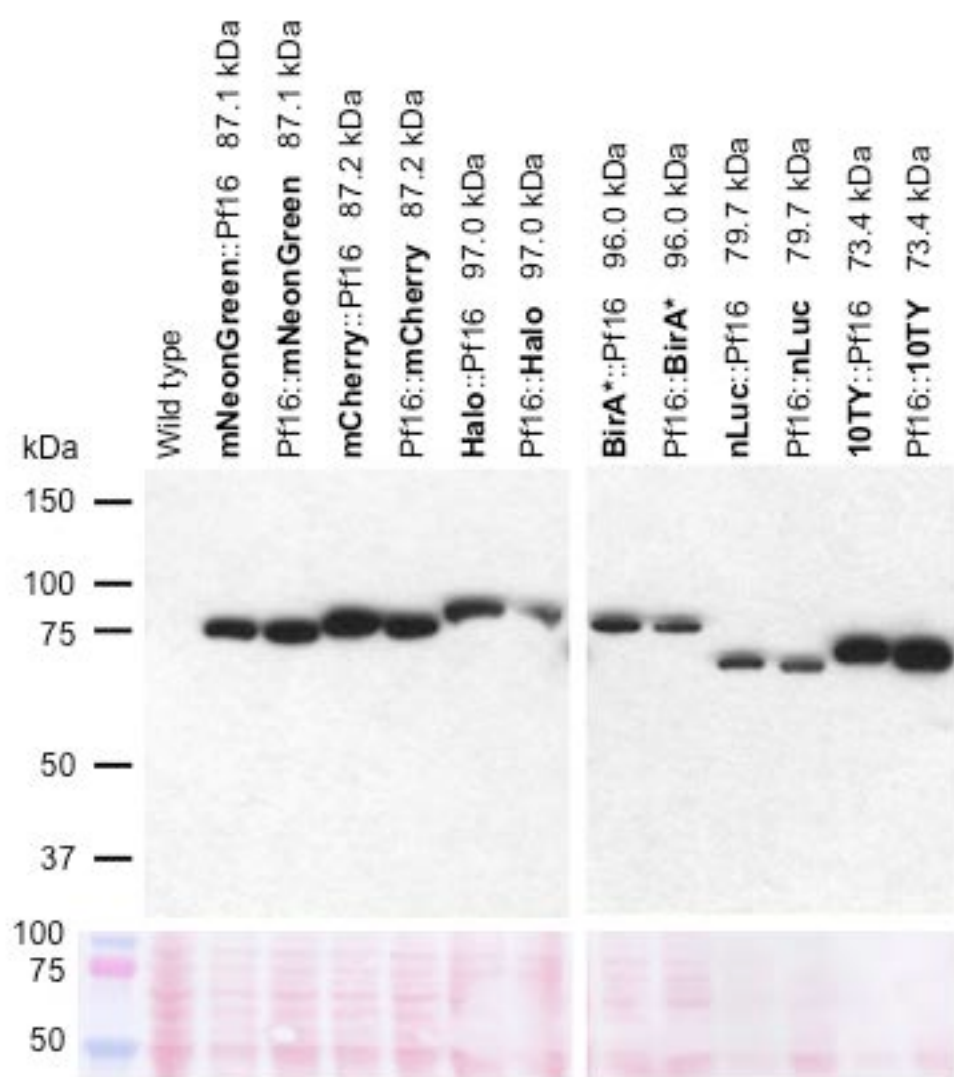

Fig. S4

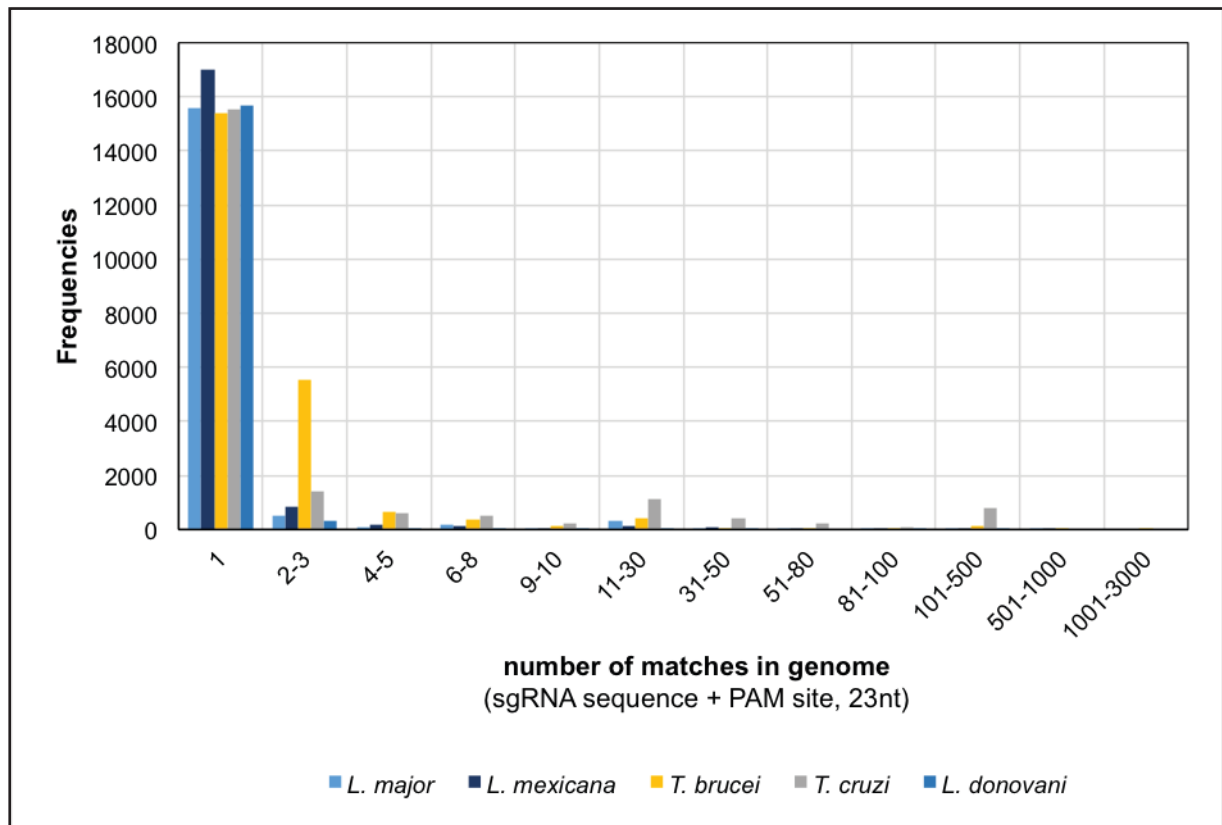

Fig. S5

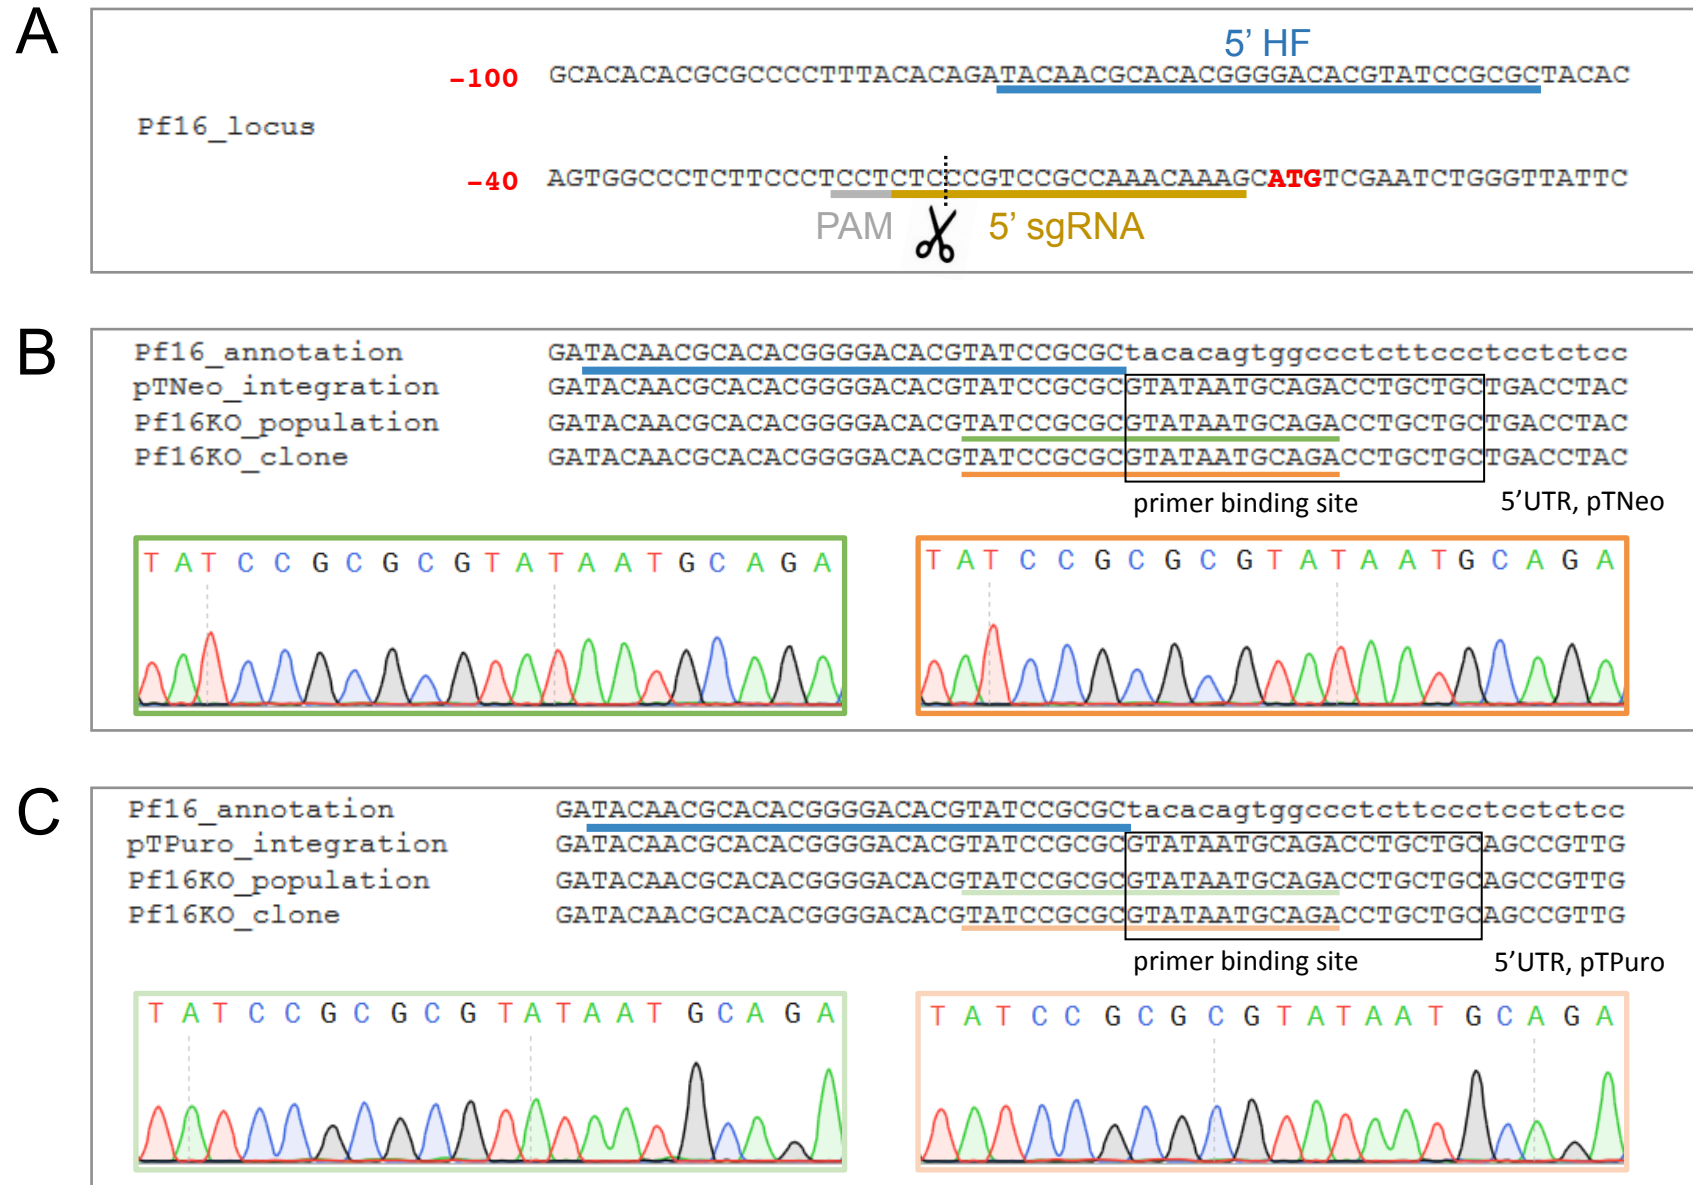

Fig. S6

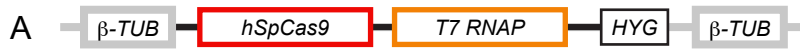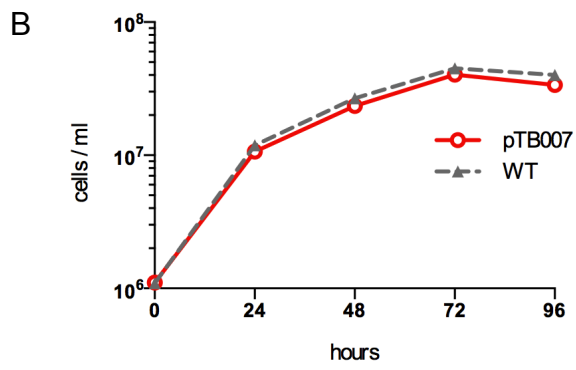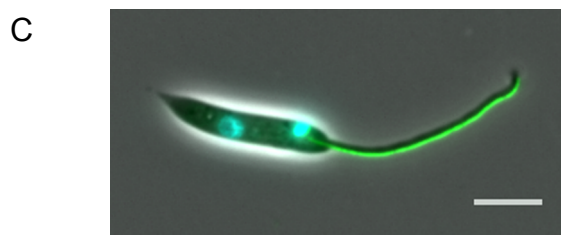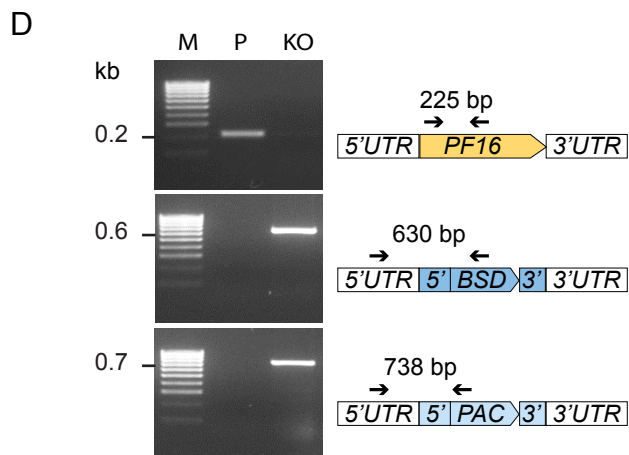

Fig. S7



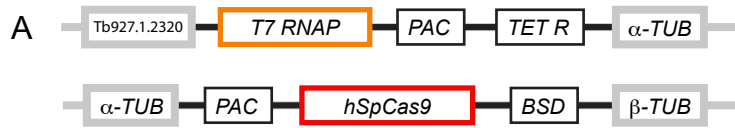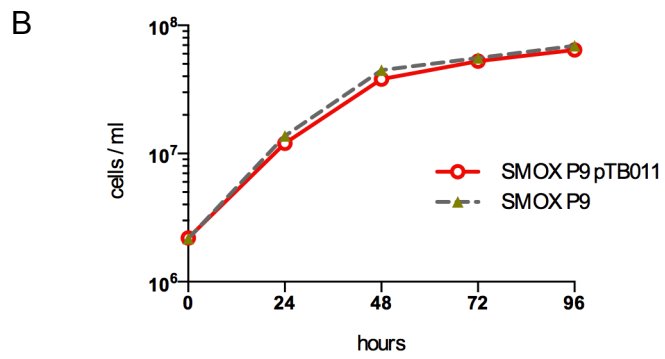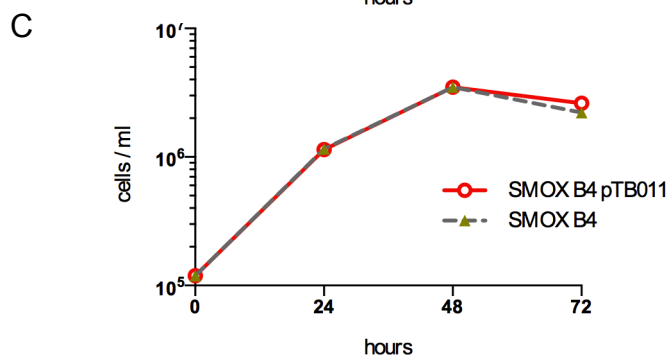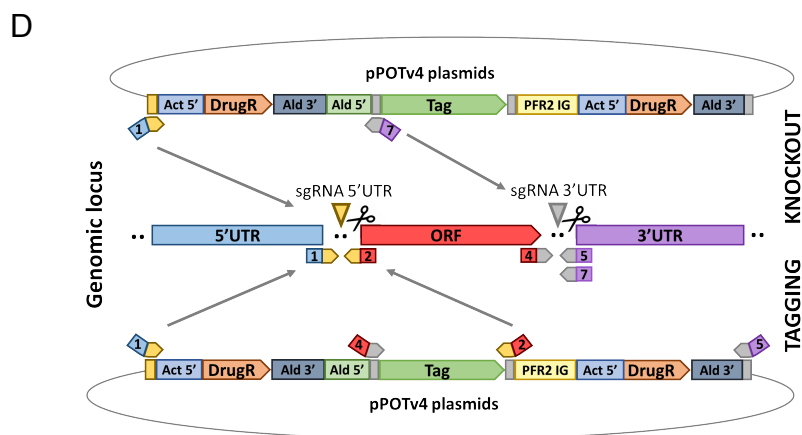

Fig. S8

## Figure Legends

### Figure S1. Expression of Cas9 and T7 RNAP

(A) Upper panel: Whole cell lysates of *L. mexicana* wild type (WT), the uncloned *L. mex* Cas9 population (P) and five clonal *L. mex* Cas9 cell lines (A2, B11, E8, G2 and G7) were analysed in a Western blot probed with anti-FLAG. The calculated MW for hSpCas9 is 165kDa. C, positive control containing a 41 kDa protein with a FLAG epitope (Abcam, ab5395). Lower panel: the membrane stained with Ponceau S before antibody detection. (B) histogram showing cell volumes of *L. mexicana* wild type cells and *L. mex* Cas9 clone G2 measured using a CASY cell counter. (C, D) Growth curves of *L. mexicana* wild type, *L. mex* Cas9 clone G2, *L. mex* Cas9 T7 clones c2 and c5. Cultures were seeded at  $1 \times 10^6$  cells/ml and cells were counted and diluted back to  $1 \times 10^6$  cells/ml every 24 h (C) or left to grow to stationary phase (D).

### Figure S2. Detection of Cas9 and T7 RNAP in Western blots of *Leishmania* spp. and *T. brucei* cell lines

Western blot of whole cell lysates probed with anti-Flag (upper-panel) or anti-T7 RNAP (lower-panel). The asterisk (\*) indicates the *L. mex* Cas9 T7 cell line. The Ponceau S-stained membrane for each blot, showing the tubulin band, is included as a loading control.

### Figure S3. Detailed maps of pPLOT and pT

Maps of pT and pPLOT plasmids. Dotted lines indicate site where they were linearized for display purposes. The 5' and 3' UTRs flanking the drug resistance genes in pTBlast, pTPuro and pTNeo are labelled with LmxM GeneIDs indicating the origin of the UTR sequences.

### Figure S4. Detection of pPLOT tags on Western blot

The *L. mexicana* PF16 gene was tagged in its endogenous locus with pPLOT amplicons encoding different tags; for each tag two cell lines were produced, to generate N- or C-

terminal fusions. Upper panel: Western blot of whole cell lysates tagged with an anti-myc antibody. Lower panel: the membrane stained with Ponceau S before antibody detection. Tagged nLuc runs slightly faster than its calculated MW.

### **Figure S5. sgRNA target counts for automated primer design**

Each selected sgRNA target (including the PAM site) was aligned to the relevant genome and the number of matches was counted. The histogram shows frequencies for counted numbers of matches; the majority of sgRNAs match a unique site in the genome.

### **Figure S6. Sequence of edited *PF16* locus**

(A) 5' end of the *PF16* gene sequence. The location of the 5'HF, 20 nt gRNA target and cleavage site are indicated. Red numbers indicate nucleotide positions relative to the start codon and red letters denote the start codon. PAM, protospacer adjacent motif. (B, C) Sequence alignment of the annotated *PF16* sequence and expected sequence resulting from integration of the pT drug resistance cassettes pTNeo (B) or pTPuro (C) and sequencing reads obtained from the  $\Delta$ *PF16* population and a  $\Delta$ *PF16* clone; green and orange boxes show the sequencing chromatograms.

### **Figure S7. Tagging and knockout of *PF16* in *L. major***

(A) Diagram showing *hSpCas9* and *T7 RNAP* integrated in the  $\beta$ -*tubulin* locus ( $\beta$ -*TUB*) of *L. major*. (B) Growth curve of *L. major* wild type (WT) and *L. major* pTB007. (C) Micrograph showing flagellar localisation of PF16::mNG in *L. major* pTB007 co-transfected with a tagging cassette amplified from pPLOT and *PF16* sgRNA template. Phase contrast image merged with mNG fluorescence (green) and Hoechst-stained DNA fluorescence (cyan). Scale bar 5  $\mu$ m. (D) PCR analysis of the *L. major* pTB007  $\Delta$ *PF16* cell line. Left panel: PCR products visualised on agarose gel. M, 100 bp DNA ladder; P, parental cell line *L. major* pTB007; KO,  $\Delta$ *PF16* population. Right panel: diagram showing the *PF16* locus and PCR primers (arrows)

used to test for presence of the CDS or correct integration of drug resistance genes (blue boxes).

**Figure S8. *T. brucei* cell lines expressing Cas9 and T7 RNAP**

(A) Diagram showing location of *T7 RNAP* upstream of the tubulin (*TUB*) array in *T. brucei* SmOx cell lines (adapted from Poon *et al.*, 2012. *Open Biology*. **2**, 110037; *TET R* denotes Tetracyclin repressor protein gene) and pTB011 integrated in the tubulin locus for expression of hSpCas9. (B, C) Growth curves of procyclic form *T. brucei* SmOx P9, bloodstream form SmOx B4 and their pTB011-transfected derivatives. (D) Strategy for donor DNA amplification from pPOTv4 plasmids (Dean *et al.*, 2015. *Open Biology*. **5**, 140197). primer pairs 1/2 and 4/5 amplify N- and C-terminal tagging cassettes, respectively; primer pair 1/7 amplifies knockout cassettes. Primers include 30 nt HF for double-strand break repair by homologous recombination. Primers 3 and 6 (not shown) are used to amplify the 5' and 3' sgRNA templates.

## Supplementary methods

### Antibodies and buffers used in Western blots

| Antibody                    | Blocking buffer         | 1 <sup>st</sup> Ab dilution         | Wash buffer             | 2 <sup>n</sup> Ab buffer                          |
|-----------------------------|-------------------------|-------------------------------------|-------------------------|---------------------------------------------------|
| Anti-T7 RNAP, Novagen 70566 | TBST* + 1% gelatin      | 1:2,500 in TBST                     | TBST                    | Anti-mouse<br>1:20,000<br>TBST + 1% milk (Marvel) |
| Anti-myc, Millipore 05-724  | TBST + 5% milk (Marvel) | 1:3,000 in TBST + 5% milk (Marvel)  | TBST + 5% milk (Marvel) | Anti-mouse<br>1:20,000<br>TBST + 5% milk (Marvel) |
| Anti-FLAG M2, Sigma F3165   | TBST + 5% milk (Marvel) | 1:25,000 in TBST + 5% milk (Marvel) | TBST + 5% milk (Marvel) | Anti-mouse<br>1:20,000<br>TBST + 5% milk (Marvel) |
| Anti-LPG, LT22 [1]          | TBST + 5% milk (Marvel) | 1:1,000 in TBST + 5% milk (Marvel)  | TBST                    | Anti-mouse<br>1:20,000<br>TBST + 5% milk (Marvel) |
| Anti-GPI-PLC [2]            | TBST + 5% milk (Marvel) | 1:1,500 in TBST + 5% milk (Marvel)  | TBST + 5% milk (Marvel) | Anti-rabbit<br>1:5,000 in TBST + 5% milk (Marvel) |

\*TBST: Tris-buffered saline with 0.05% Tween 20

1. Ilg T, Harbecke D, Wiese M, Overath P (1993) Eur J Biochem 217: 603-615.
2. Sunter J, Webb H, Carrington M (2013) PLoS Pathog 9: e1003566.

## PCR Primers

All sequences are written in the 5' to 3' orientation. Underlined sequences indicate sgRNA target sites.

## sgRNA transcription

|                                                        |                                                                                     |
|--------------------------------------------------------|-------------------------------------------------------------------------------------|
| sgRNA forward<br>(n. gene-specific<br>target sequence) | GAAATTAATACGACTCACTATAGGnnnnnnnnnnnnnnnnnnnnGTTTTAGAGCTAGAAATAGC                    |
| G00                                                    | AAAAGCACCGACTCGGTGCCACTTTTTCAAGTTGATAACGGACTAGCCTTATTTAACTTGCTATT<br>TCTAGCTCTAAAAC |

## Recombination rate measurement

|                          |                                                                                  |
|--------------------------|----------------------------------------------------------------------------------|
| PF16 3' sgRNA<br>forward | GAAATTAATACGACTCACTATAGG <u>TGCAGCAGCACTAGCGGGGGAGGG</u> TTTTAGAGCTAGAAAT<br>AGC |
|--------------------------|----------------------------------------------------------------------------------|

## mCherry / eYFP double tagging of PF16

|                         |                                                                                   |
|-------------------------|-----------------------------------------------------------------------------------|
| PF16 eYFP<br>forward    | 333: AAGATCGAGAACTACCACGTGCAGCAGCACGTGAGCAAGGGCGAGGAGCTGTT                        |
| PF16 eYFP<br>reverse    | 334: GCAGCGTGCATGGGCGTGACTGTGCCGAAATTAGCCCTCCCACACATAACCCAGAG                     |
| PF16 mCherry<br>forward | 335: AAGATCGAGAACTACCACGTGCAGCAGCACACTAGTATGGTGAGCAAGGGCGAGG                      |
| PF16 mCherry<br>reverse | 336: GCAGCGTGCATGGGCGTGACTGTGCCGAAATTACACTTTATGCTTCCGGCTCGTATGTTG                 |
| PF16 sgRNA<br>forward   | 295:<br>GAAATTAATACGACTCACTATAGG <u>CGGATGCTCAGCGGGCCTTTG</u> TTTTAGAGCTAGAAATAGC |

## Construction of pT plasmids

|         | 5'UTR,<br>1 <sup>st</sup> reaction                             | 3'UTR,<br>1 <sup>st</sup> reaction                               | Nested primers,<br>2 <sup>nd</sup> second reaction                          |
|---------|----------------------------------------------------------------|------------------------------------------------------------------|-----------------------------------------------------------------------------|
| pTBlast | 478F:<br>TTAGCAATCTGAGCAATCTGCCGGA<br>TGAAAACGAGAGAGAGAC       | 480F:<br>CTCTGGTTATGTGTGGGAGGG<br>CTAAATAGAAGCCACACCGCG<br>TGAG  | 482F:<br>GTCGCAATTTAAATGTATAATGCAG<br>ACCTGCTGCCGGATGAAAACGAGA<br>GAGAGAC   |
|         | 479R:<br>GGGTGGATTCTTCTTGAGACAAAGG<br>CATGGTGGAGCGAGGATACGAG   | 481R:<br>TCTTAGTACGAACTGCAATGCA<br>ACCAGTGTGTCAGTTGGAGAG<br>A    | 483R:<br>CGAGTCATTTAAATCCAATTTGAGA<br>GACCTGTGCAACCAAGTGTGTCAGT<br>TGGAGAGA |
| pTNeo   | 502F:<br>TTAGCAATCTGAGCAATCTGCTGAC<br>CTACGCAGCCTTTTGCG        | 504F:<br>CTATCGCCTTCTTGACGAGTTC<br>TTCTGAAGCTCCGCCGGTGTT<br>CGTC | 506F:<br>GTCGCAATTTAAATGTATAATGCAG<br>ACCTGCTGCTGACCTACGCAGCCT<br>TTTGCG    |
|         | 503R:<br>TCCATCTTGTCAATGGCCGATCCC<br>ATAGCCTTCGAGTATGAGCTGCTTT | 505R:<br>TCTTAGTACGAACTGCAATGCA<br>GATGAGAAAGCGCGGCCATC          | 507R:<br>CGAGTCATTTAAATCCAATTTGAGA<br>GACCTGTGCAGATGAGAAAAGCGC              |

|        |                                                                          |                                                                |                                                                            |
|--------|--------------------------------------------------------------------------|----------------------------------------------------------------|----------------------------------------------------------------------------|
|        |                                                                          |                                                                | GGCCATC                                                                    |
| pTPuro | 496F:<br>TTAGCAATCTGAGCAATCTGCAGCC<br>GTTGCATTGGTGGTCGT                  | 498F:<br>CATGACACGTAAGCCGGGAGC<br>CTAAGTCGAGCGCTCACCTCT<br>GAA | 500F:<br>GTCGCAATTTAAATGTATAATGCAG<br>ACCTGCTGCAGCCGTTGCATTGGT<br>GGTCGT   |
|        | 497R:<br>GACGAACCGTTGGCTTGTATTCAAGT<br>CATTATGAAAGACCGCAAAAGAAAA<br>TGTG | 499R:<br>TCTTAGTACGAACTGCAATGCG<br>TCGTTGTAGTTCATGGAGACAC      | 501R:<br>CGAGTCATTTAAATCCAATTTGAGA<br>GACCTGTGCGTCGTTGTAGTTCAT<br>GGAGACAC |

### Construction of pPLOT plasmids

|                        |                                                                                                            |
|------------------------|------------------------------------------------------------------------------------------------------------|
| 5'PGKB myc-tag forward | 473:<br>TTAGCAAAGCTTAGAACCGGAACCGGAACCACTACCAGAACCAGGTCTCCTCGCTAATCAGC<br>TTCTGCTCGAGGTCTCCTCGCTAATGA      |
| 5'PGKB myc-tag reverse | 474:<br>AACTATCTTCCACTTGTCAAGCATGGAACAGAAGCTGATCAGCGAAGAAGACCTGGAGCAAAAG<br>CTCATTAGCGAGGAGGACCTCGAGCA     |
| 5'PGKB second reaction | 472:<br>TTAGCAACGCGTTCGAGACCGACAAGACCAGAAT                                                                 |
| PGKB/A myc-tag forward | 475:<br>TTAGCAGGATCCGGATCAGGATCTGGATCAGGATCGGGTAGTGAACAGAAGCTGATCAGCGAAG<br>AAGACCTGGAGCAAAAGCT            |
| PGKB/A myc-tag reverse | 476:<br>GAATTCTCAGTGGTGGTGGTGTACAGGTCTCCTCGCTAATCAGCTTCTGCTCGAGGTCTC<br>CTCGCTAATGAGCTTTTGTCCAGGTCTTCTTCGC |
| PGKB/A second reaction | 477:<br>TTAGCAGCTAGCCGCTTGACAAGTGAAGATAGTTG                                                                |

### Construction of addback plasmids

|              |                                             |
|--------------|---------------------------------------------|
| PF16 forward | 533ABF: GCAATCACTAGTCAAACAAGCATGTGCAATCGGG  |
| PF16 reverse | 533ABR: GTCGAGAAATCCCTCCTCCCCGCTAGTGCTGCT   |
| LPG1 forward | LPG_350: TTACGTACTAGTCACAGAGAAATGGCGCCG     |
| LPG1 reverse | LPG_351: TTACGTCCTCGAGBAGAATGCTTAACGGGAGCGA |

### Tagging and knockout of PF16 and LPG1 with pT / pPLOT plasmids in *L. mexicana*

|                                   |                                                                          |
|-----------------------------------|--------------------------------------------------------------------------|
| <i>Lmex</i> PF16 5'HF forward     | 533NF: TACAACGCACACGGGGACACGTATCCGCGCgtataatgcagacctgctgc                |
| <i>Lmex</i> PF16 5'HF reverse     | 533NR: GAAGGTTTGCAGAATAACCCGATTCGACATactaccgatcctgatccag                 |
| <i>Lmex</i> PF16 3'HF forward     | 533CF: AAGATCGAGAACTACCACGTGCAGCAGCACggttctgtagtggttccgg                 |
| <i>Lmex</i> PF16 3'HF reverse     | 533CR: CGCGACGAGCAGCGTGCATGGGCGTGACTGccaattgagagacctgtgc                 |
| <i>Lmex</i> PF16 5' sgRNA forward | GAAATTAATACGACTCACTATAGGC <u>TTTTGTTGGCGGACGGGAGGTTTTAGAGCTAGAAATAGC</u> |
| <i>Lmex</i> PF16 3' sgRNA reverse | GAAATTAATACGACTCACTATAGGC <u>GGATGCTCAGCGGGCCTTTGTTTTAGAGCTAGAAATAGC</u> |

|                       |                                                                     |
|-----------------------|---------------------------------------------------------------------|
| sgRNA forward         |                                                                     |
| LPG1 5'HF forward     | LPG_313: GAGGACGCGCGCCGGTTATCGTTACCTAGAgataatgcagacctgtgc           |
| LPG1 3'HF reverse     | LPG_315: CCAACTTGCGGAATGCGCGCGTCGCAACGGccaattgagagacctgtgc          |
| LPG1 5' sgRNA forward | GAAATTAATACGACTCACTATAGGTGTTTCTACGAGGAGGCACTGGGGTTTTAGAGCTAGAAATAGC |
| LPG1 3' sgRNA forward | GAAATTAATACGACTCACTATAGGGGAGCGTGTGCGGCGCATCAGGGTTTTAGAGCTAGAAATAGC  |

### Tagging and knockout of PF16 with pT / pPLOT plasmids in *L. major*

|                                   |                                                                  |
|-----------------------------------|------------------------------------------------------------------|
| <i>LmjF</i> PF16 5'HF forward     | 587NF: CGTATCAGCGCTACACAGTGGCCCTCTCCTgtataatgcagacctgtgc         |
| <i>LmjF</i> PF16 5'HF reverse     | 587NR: GAAGGTTTGCAGAATAACCCGATTCGACATactacccgatcctgatccag        |
| <i>LmjF</i> PF16 3'HF forward     | 587CF: AAGATCGAGAACTACCACGTGCAGCAGCACggttctgtagtggtccgg          |
| <i>LmjF</i> PF16 3'HF reverse     | 587CR: CGAGCAGCGTGCCTGGGCGTGACTATGCCGccaattgagagacctgtgc         |
| <i>LmjF</i> PF16 5' sgRNA forward | GAAATTAATACGACTCACTATAGGCTTTGTGTGGCGGCGAGGAGTTTTAGAGCTAGAAATAGC  |
| <i>LmjF</i> PF16 3' sgRNA forward | GAAATTAATACGACTCACTATAGGGCTGATGCTCAGCCGCCATTGTTTTAGAGCTAGAAATAGC |

### Tagging and knockout of GPI-PLC

|                                        |                                                                  |
|----------------------------------------|------------------------------------------------------------------|
| GPI-PLC 5'HF forward                   | 593NF: AAAGAAAGAAAGAAAGAAAGAAAGAAAAAGGTATAATGCAGACCTGCTGC        |
| GPI-PLC PF16 5'HF reverse              | 593NR: CTGCGGTGACCACTTTACACCACCAAACATACTACCCGATCCTGATCCAG        |
| GPI-PLC PF16 3'HF forward              | 593CF: CATTAAACACCAACCAAACCGCAAGGTCAGGTTCTGGTAGTGGTTCCGG         |
| GPI-PLC PF16 3'HF reverse for tagging  | 593CR: CACTTAACTTTTTTTTACTTTTTAAACCCTCCAATTTGAGAGACCTGTGC        |
| GPI-PLC PF16 3'HF reverse for knockout | 593CRF: CACTTAACTTTTTTTTACTTTTTAAACCCTCCGGAACCACTACCAGAACC       |
| GPI-PLC PF16 5' sgRNA forward          | GAAATTAATACGACTCACTATAGGAGGGGAAGGGGACTTTGAGAGTTTTAGAGCTAGAAATAGC |
| GPI-PLC PF16 3' sgRNA forward          | GAAATTAATACGACTCACTATAGGCTGCGTTTGTGACTGAAACAGTTTTAGAGCTAGAAATAGC |

### Knockout validation

|                   |                              |                                |
|-------------------|------------------------------|--------------------------------|
| ORF amplification | <i>Lmex</i> PF16 ORF forward | 533OF: CCTTCGACGAGTACCAGAAGGCA |
|-------------------|------------------------------|--------------------------------|



|                                                                          |                                 |                                |
|--------------------------------------------------------------------------|---------------------------------|--------------------------------|
|                                                                          | <i>Lmex</i> PF16 ORF reverse    | 533OR: CATCTCCAGACACGACGTTCTCG |
|                                                                          | <i>LmajF</i> PF16 ORF forward   | 587OF: GACGAGTACCAGAAGGCACG    |
|                                                                          | <i>LmajF</i> PF16 ORF reverse   | 587OR: CATCTCCAGAAACGACGTTTC   |
|                                                                          | LPG1 ORF forward                | LPG_334: ATTAGTGCGTATCGGCCTGT  |
|                                                                          | LPG1 ORF reverse                | LPG_335: AATGACAGCGAATATTCTCGC |
|                                                                          | GPI-PLC forward                 | 593OF: TCATGGATGAGTGACACGCG    |
|                                                                          | GPI-PLC reverse                 | 593OR: AAAGATTTTGACAACGTCCC    |
| Amplification of sequence across integration junction, <i>Lmex</i> PF16  | <i>Lmex</i> PF16 5'UTR forward  | 533UF: GACGTCGCTGCAGAAGTTATCCT |
|                                                                          | Neomycin reverse                | 519: GTCTTGACAAAAGAACCGGGC     |
|                                                                          | Puromycin reverse               | 558: TCAATGTGTCGATCTGGGTCAAC   |
| Amplification of sequence across integration junction, LPG1              | LPG1 3'UTR reverse              | LPG_331: TTGATTCGGTGATGGCTCG   |
|                                                                          | Blasticidin forward             | LPG_127: CTGCATCCTGGGATCAAAGC  |
|                                                                          | Neomycin forward                | LPG_319: ACCGTTCTCTCGTGCTTTA   |
| Amplification of sequence across integration junction, <i>LmajF</i> PF16 | <i>LmajF</i> PF16 5'UTR forward | 587UF: TGACATTGCTGCCGAAGTGA    |
|                                                                          | Blasticidin reverse             | 518A: CCGTTGCTCTTTCAATGAGGGTG  |
|                                                                          | Puromycin reverse               | 558: TCAATGTGTCGATCTGGGTCAAC   |
| Amplification of sequence across integration junction, GPI-PLC           | GPI-PLC 5'UTR forward           | 593UF: GTCGTCGTAGTTGTTGTTAT    |
|                                                                          | Neomycin reverse                | 519: GTCTTGACAAAAGAACCGGGC     |
|                                                                          | Hygromycin reverse              | JV78: CAGCTATTTACCCGCAGGAC     |
| Sequencing primers for analysis of <i>Lmex</i> PF16 knockout cell line   | Neomycin integration            | 532: CTGTTCCCTGTCGTACGAAAG     |
|                                                                          | Puromycin integration           | 533UF: GACGTCGCTGCAGAAGTTATCCT |

### Detection of sgRNA template

|      |                           |
|------|---------------------------|
| G00F | 562: TTAATACGACTCACTATAGG |
| G00R | 563: GCACCGACTCGGTGCCACTT |
